# Supplementary material
Source: Springer Nature journal article supplement (https://www.springermedizin.de/resource/supplementary/13058_2010_9525_MOESM12_ESM.pdf/9702292)

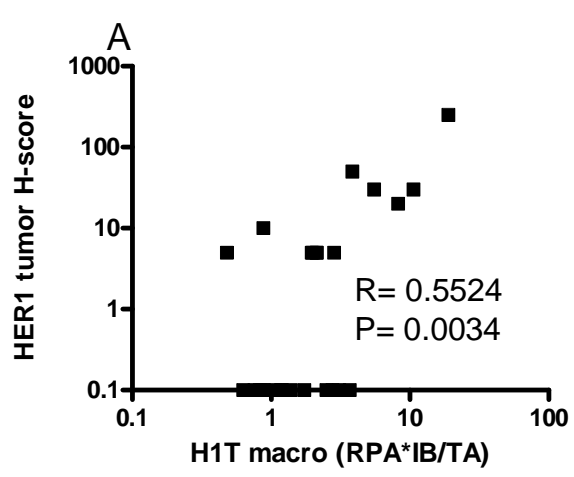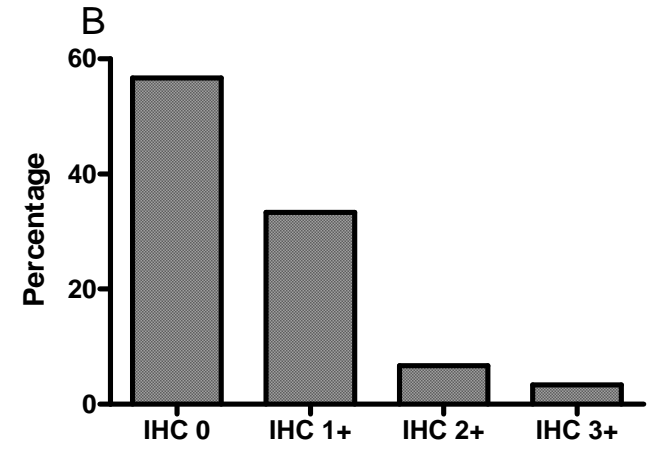

**C.** HER1 IHC = 3+; HER2-

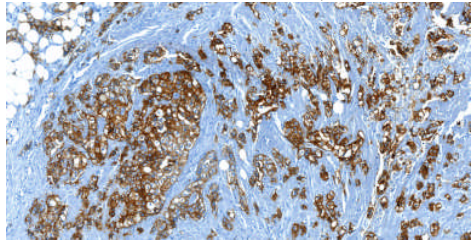

**D.** HER1 IHC=2+; HER2+

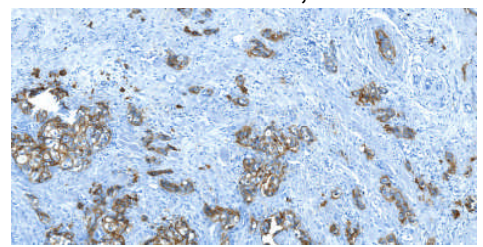

**E.** HER1 IHC = 1+; HER2+

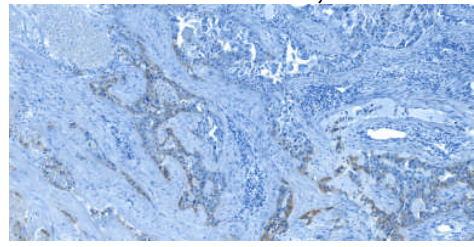

**F.** HER1 IHC = 0; HER2+

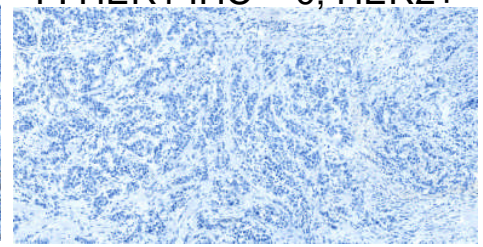

**G.** HER1 IHC = 3+; HER2-

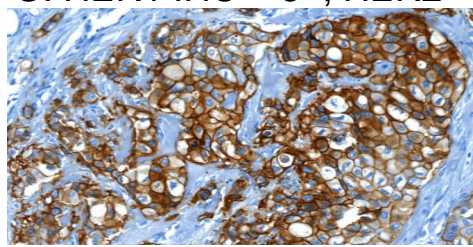

**H.** HER1 IHC=2+; HER2+

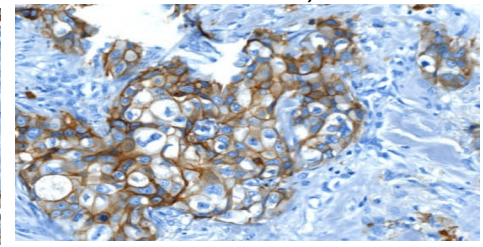

**I.** HER1 IHC = 1+; HER2+

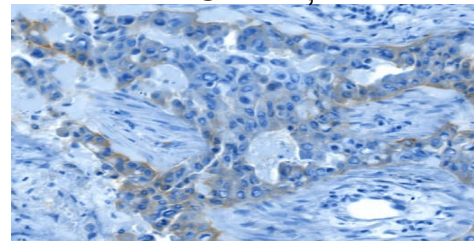

**J.** HER1 IHC = 0; HER2+

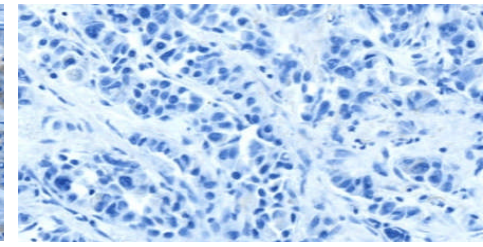

Supplement: MOESM12 [file 9702292]
